# Supplementary material for: Activation of Interferon-Stimulated Genes following Varicella-Zoster Virus Infection in a Human iPSC-Derived Neuronal In Vitro Model Depends on Exogenous Interferon-α
Source: MDPI journal article supplement (doi:10.3390/v14112517), 2022-11-14
Supplement: s1 [file s1]

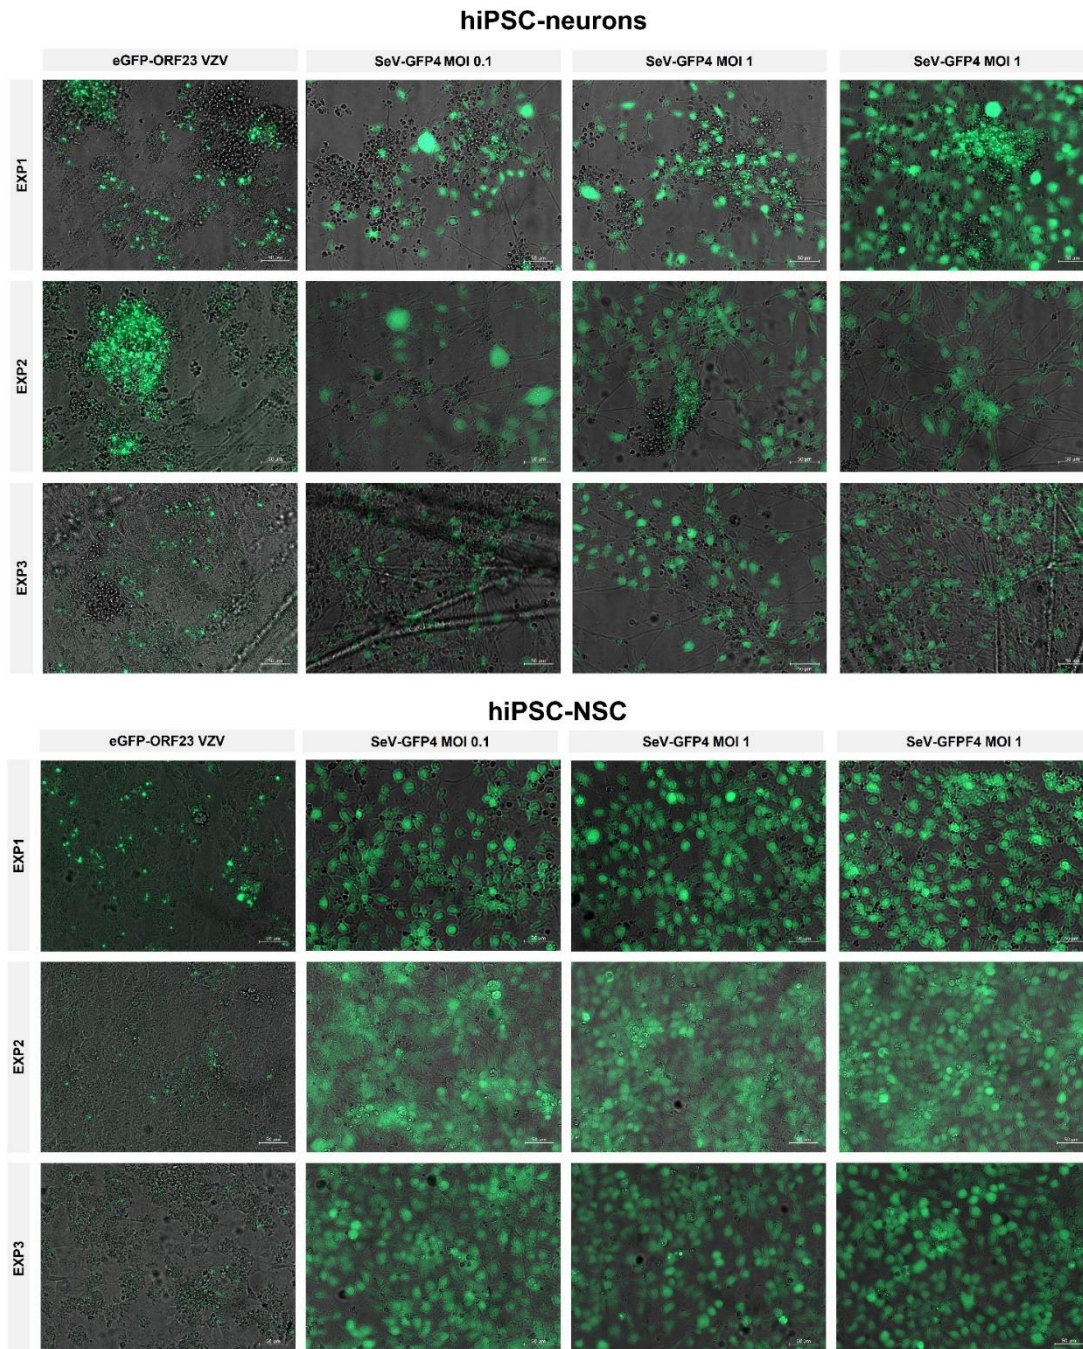

**Supplementary Figure S1:** Immunofluorescent images of hiPSC-neurons and hiPSC-NSC 24h post-inoculation with eGFP-ORF23 VZV lysate or SeV-GFP. Representative immunofluorescent images at 24hpi of hiPSC-neurons (upper panels) and hiPSC-NSC (lower panels) from each experiment, inoculated with  $1.5 \times 10^2$  PFU eGFP-ORF23 VZV lysate or SeV-GFP at MOI 0.1, 1, or 10 are shown, indicating successful infection by expression of eGFP and GFP, respectively.
